# Supplementary material for: Gabapentin for the treatment of pain manifestations in children with severe neurological impairment: a single-centre retrospective review
Source: PubMed Central journal article supplement — BMJ Paediatr Open. 2019 Jul 21;3(1):e000467. doi: 10.1136/bmjpo-2019-000467 (PMC6668755; doi:10.1136/bmjpo-2019-000467), 2019-07-21
Supplement: bmjpo-2019-000467.draft_revisions.pdf [file bmjpo-2019-000467.draft_revisions.pdf]

# BMJ Paediatrics Open

BMJ Paediatrics Open is committed to open peer review. As part of this commitment we make the peer review history of every article we publish publicly available.

When an article is published we post the peer reviewers' comments and the authors' responses online. We also post the versions of the paper that were used during peer review. These are the versions that the peer review comments apply to.

The versions of the paper that follow are the versions that were submitted during the peer review process. They are not the versions of record or the final published versions. They should not be cited or distributed as the published version of this manuscript.

BMJ Paediatrics Open is an open access journal and the full, final, typeset and author-corrected version of record of the manuscript is available on our site with no access controls, subscription charges or pay-per-view fees (<http://bmjpaedsopen.bmj.com>).

If you have any questions on BMJ Paediatrics Open's open peer review process please email [info.bmjpo@bmj.com](mailto:info.bmjpo@bmj.com)

# BMJ Paediatrics Open

## Gabapentin for the Treatment of Pain Manifestations in Children with Severe Neurological Impairment

|                               |                                                                                                                                                                                                                                                                                                                                                                                                                                                                                                                                                                                                                                                                                                                                                                                                                                                                                                                                                                                                     |
|-------------------------------|-----------------------------------------------------------------------------------------------------------------------------------------------------------------------------------------------------------------------------------------------------------------------------------------------------------------------------------------------------------------------------------------------------------------------------------------------------------------------------------------------------------------------------------------------------------------------------------------------------------------------------------------------------------------------------------------------------------------------------------------------------------------------------------------------------------------------------------------------------------------------------------------------------------------------------------------------------------------------------------------------------|
| Journal:                      | <i>BMJ Paediatrics Open</i>                                                                                                                                                                                                                                                                                                                                                                                                                                                                                                                                                                                                                                                                                                                                                                                                                                                                                                                                                                         |
| Manuscript ID                 | bmjpo-2019-000467                                                                                                                                                                                                                                                                                                                                                                                                                                                                                                                                                                                                                                                                                                                                                                                                                                                                                                                                                                                   |
| Article Type:                 | Original article                                                                                                                                                                                                                                                                                                                                                                                                                                                                                                                                                                                                                                                                                                                                                                                                                                                                                                                                                                                    |
| Date Submitted by the Author: | 20-Feb-2019                                                                                                                                                                                                                                                                                                                                                                                                                                                                                                                                                                                                                                                                                                                                                                                                                                                                                                                                                                                         |
| Complete List of Authors:     | Collins, Aedin; Our Lady's Children's Hospital, National Centre for Paediatric Gastroenterology, Hepatology and Nutrition<br>Mannion, Rory; Our Lady's Children's Hospital, National Centre for Paediatric Gastroenterology, Hepatology and Nutrition<br>Broderick, Annemarie; Our Lady's Children's Hospital, Crumlin, National Centre for Paediatric Gastroenterology, Hepatology and Nutrition; UCD School of Medicine and Medical Science,<br>Hussey, Séamus; Our Lady's Children's Hospital, Crumlin and the National Children's Research Centre, National Centre for Paediatric Gastroenterology, Hepatology and Nutrition; UCD School of Medicine and Medical Science,<br>Devins, Mary; Our Lady's Children's Hospital, Palliative Medicine; Coombe Women and Infants University Hospital<br>Bourke, Billy; Our Lady's Children's Hospital, Crumlin, National Centre for Paediatric Gastroenterology, Hepatology and Nutrition; UCD School of Medicine and Medical Science, Conway Institute |
| Keywords:                     | General Paediatrics, Neurodisability, Pain, Palliative Care, Gastroenterology                                                                                                                                                                                                                                                                                                                                                                                                                                                                                                                                                                                                                                                                                                                                                                                                                                                                                                                       |
|                               |                                                                                                                                                                                                                                                                                                                                                                                                                                                                                                                                                                                                                                                                                                                                                                                                                                                                                                                                                                                                     |

SCHOLARONE™  
Manuscripts

## Gabapentin for the Treatment of Pain Manifestations in Children with Severe Neurological Impairment

Aedín Collins<sup>1</sup>, Rory Mannion<sup>1</sup>, Annemarie Broderick<sup>1</sup>, Séamus Hussey<sup>1,3</sup>, Mary Devins<sup>2</sup>, Billy Bourke<sup>1,3</sup>

1. National Centre for Paediatric Gastroenterology, Hepatology and Nutrition, Our Lady's Children's Hospital, Crumlin, Dublin 12, Ireland
2. Department of Palliative Care, Our Lady's Children's Hospital, Crumlin 12, Dublin, Ireland
3. Department of Paediatrics, University College Dublin, Belfield, Dublin, Ireland

### Corresponding Author:

Aedín Collins

Senior Paediatric Fellow, Department of General Paediatrics, Evelina London Children's Hospital, Westminster Bridge Rd, Lambeth. London SE1 7EH

00447538 584 683

[aedincollins@gmail.com](mailto:aedincollins@gmail.com)

**Abbreviations:** Severe Neurological Impairment: SNI

**Table of Contents Summary:** This study reports on the efficacy of gabapentin and pregabalin for management of pain and distress in children with severe neurological impairment.

**What is known on this subject:** Pain, irritability and distress, often of uncertain origin, are significant issues affecting quality of life in children with SNI. Therapeutic options are limited but preliminary reports suggest the efficacy of gabapentin in these children.

**What this paper adds:** With the largest reported patient cohort to date, this study provides further evidence for gabapentin treatment in management of pain and distress symptoms in children with SNI. It also indicates that pregabalin may be effective as a second line agent.

**Financial Disclosure:** The authors have no financial relationships relevant to this article to disclose.

**Funding:** None

**Potential Conflicts of Interest:** The authors have no conflicts of interest relevant to this article to disclose.

**Word Count:** 1859

## Contributors' Statement

Dr Collins conceptualized and designed the study, designed data collection instruments, collected the data, drafted the initial manuscript, and reviewed and revised the manuscript.

Dr Mannion designed the study, designed data collection instruments, collected the data and reviewed and revised the manuscript.

Dr Hussey and Dr Broderick conceptualized the study, designed data collection instruments and critically reviewed the manuscript for important intellectual content.

Prof Bourke and Dr Devins conceptualized and designed the study, designed data collection instruments, carried out the initial analysis and reviewed and revised the manuscript.

All authors approved the final manuscript as submitted and agree to be accountable for all aspects of the work.

## Abstract

**Introduction:** Pain, irritability and feeding intolerance are common symptoms affecting quality of life in children with severe neurological impairment (SNI). There exist few therapeutic options for the many children in whom a specific organic etiology is not found. We performed a retrospective study to explore the use of gabapentin and pregabalin for symptom control in children with SNI.

**Methods:** This is a retrospective study involving patients currently attending the palliative care and gastroenterology departments of a tertiary level paediatric hospital in Ireland. Children with SNI on treatment with gabapentin for irritability, vomiting and pain of unknown origin were included. Information was gathered from medical and nursing documentation.

**Results:** A total of 42 patients were included. Irritability was reduced in 71% of patients. There was an overall symptom improvement in 76.3%, with increased gastrointestinal symptoms in only one patient. Pregabalin replaced gabapentin as a second line agent in 12 children. Some degree of benefit was reported in 9 children while 25% had substantial improvement. Adverse effects of both medications were rare.

**Conclusions:** Gabapentin and pregabalin have a role in management of symptoms of pain manifestations in children with SNI.

## Introduction

Pain and distress symptoms are amongst the most challenging clinical problems faced by those caring children with severe neurological impairment (SNI). Up to 50% of children with cognitive impairment are reported to have pain episodes every week<sup>1</sup>. These are often frequent and persistent, with the most severely affected children having the most pain symptoms<sup>2</sup>. Assessing the severity and location of pain is difficult in this population due to difficulties with communication<sup>3,4</sup> and behavioral pain scales may be inaccurate due to physical impairment<sup>3</sup>. Parental assessment of pain has been shown to be accurate in these children<sup>4-6</sup> and many identify higher levels of pain in children with gastrostomy feeding and in those that suffer from gastrointestinal motility problems<sup>1,4</sup>. Symptoms are often associated with feeding and ascribed to the gastrointestinal tract<sup>2</sup>.

Even in the context of an apparent gastrointestinal source, and despite extensive investigations, the underlying cause for pain and irritability often remains unclear<sup>7</sup>. Visceral hyperalgesia, an increased response and sensitivity to stimuli within the gastrointestinal tract<sup>8</sup>, is a potential cause of this pain and irritability<sup>9-11</sup>. Children with SNI commonly have difficulties with constipation, gastroesophageal reflux disease and dysmotility<sup>9</sup>. This increases their risk of developing visceral hyperalgesia as damaged tissue, e.g. from surgery or inflammation, may lead to altered visceral afferent pathways<sup>9,12</sup>.

Management of pain and irritability of unknown origin in SNI is difficult and options are limited<sup>7</sup>. In a study published over a decade ago, Hauer et al. first identified the potential of gabapentin in 9 children with SNI<sup>9</sup>. A follow up retrospective study by the same author identified an improvement in pain behaviors in over 90% of 22 children treated with gabapentin<sup>13</sup>. While gabapentin is licensed by the FDA for adjunctive treatment of partial seizures in paediatric patients over 3 years old<sup>14</sup>, there is anecdotal evidence that it is now

1  
2  
3 being used for pain manifestations in children with SNI<sup>10</sup>. We undertook this retrospective  
4 study of all patients with SNI treated with gabapentin for pain behaviors to see if we could  
5 replicate the findings of the seminal studies published by Hauer et al.<sup>10,13</sup>.  
6  
7  
8  
9  
10

## 11 Methods

12  
13  
14 This study is a retrospective chart review of paediatric patients with SNI attending the  
15 gastroenterology and palliative care services at Our Lady's Children's Hospital Dublin who  
16 had been prescribed gabapentin treatment. Severe neurological impairment was defined as  
17 non-verbal with gross motor function classification level IV- V. Patients needed to be on  
18 gabapentin for a minimum of 3 months to be eligible for inclusion. Patients on gabapentin  
19 treatment for confirmed neuropathic pain or with inflammatory bowel disease were excluded.  
20  
21 Palliative care patients were identified using a chart review of all patients attending the  
22 palliative care service. Gastroenterology patients were identified by a word search for  
23 'gabapentin' in the patient database. Patients who were treated with gabapentin for known  
24 organic diseases and those of normal cognition were excluded.  
25  
26 Information including demographics, investigations prior to commencing gabapentin,  
27 symptoms pre and post gabapentin, dosages, duration of treatment, efficacy and adverse  
28 effects were recorded. Where a decision to switch to pregabalin was taken, similar outcome  
29 data were recorded. For the purposes of the study the effectiveness of both gabapentin and  
30 pregabalin was interpreted from medical notes according to a predetermined 5 point scale;  
31 deterioration, none, minimal, good, very good. Patients were not involved in the design or the  
32  
33  
34  
35  
36  
37  
38  
39  
40  
41  
42  
43  
44  
45  
46  
47  
48  
49  
50  
51  
52  
53  
54  
55  
56  
57  
58  
59  
60  
61  
62  
63  
64  
65  
66  
67  
68  
69  
70  
71  
72  
73  
74  
75  
76  
77  
78  
79  
80  
81  
82  
83  
84  
85  
86  
87  
88  
89  
90  
91  
92  
93  
94  
95  
96  
97  
98  
99  
100  
101  
102  
103  
104  
105  
106  
107  
108  
109  
110  
111  
112  
113  
114  
115  
116  
117  
118  
119  
120  
121  
122  
123  
124  
125  
126  
127  
128  
129  
130  
131  
132  
133  
134  
135  
136  
137  
138  
139  
140  
141  
142  
143  
144  
145  
146  
147  
148  
149  
150  
151  
152  
153  
154  
155  
156  
157  
158  
159  
160  
161  
162  
163  
164  
165  
166  
167  
168  
169  
170  
171  
172  
173  
174  
175  
176  
177  
178  
179  
180  
181  
182  
183  
184  
185  
186  
187  
188  
189  
190  
191  
192  
193  
194  
195  
196  
197  
198  
199  
200  
201  
202  
203  
204  
205  
206  
207  
208  
209  
210  
211  
212  
213  
214  
215  
216  
217  
218  
219  
220  
221  
222  
223  
224  
225  
226  
227  
228  
229  
230  
231  
232  
233  
234  
235  
236  
237  
238  
239  
240  
241  
242  
243  
244  
245  
246  
247  
248  
249  
250  
251  
252  
253  
254  
255  
256  
257  
258  
259  
260  
261  
262  
263  
264  
265  
266  
267  
268  
269  
270  
271  
272  
273  
274  
275  
276  
277  
278  
279  
280  
281  
282  
283  
284  
285  
286  
287  
288  
289  
290  
291  
292  
293  
294  
295  
296  
297  
298  
299  
300  
301  
302  
303  
304  
305  
306  
307  
308  
309  
310  
311  
312  
313  
314  
315  
316  
317  
318  
319  
320  
321  
322  
323  
324  
325  
326  
327  
328  
329  
330  
331  
332  
333  
334  
335  
336  
337  
338  
339  
340  
341  
342  
343  
344  
345  
346  
347  
348  
349  
350  
351  
352  
353  
354  
355  
356  
357  
358  
359  
360  
361  
362  
363  
364  
365  
366  
367  
368  
369  
370  
371  
372  
373  
374  
375  
376  
377  
378  
379  
380  
381  
382  
383  
384  
385  
386  
387  
388  
389  
390  
391  
392  
393  
394  
395  
396  
397  
398  
399  
400  
401  
402  
403  
404  
405  
406  
407  
408  
409  
410  
411  
412  
413  
414  
415  
416  
417  
418  
419  
420  
421  
422  
423  
424  
425  
426  
427  
428  
429  
430  
431  
432  
433  
434  
435  
436  
437  
438  
439  
440  
441  
442  
443  
444  
445  
446  
447  
448  
449  
450  
451  
452  
453  
454  
455  
456  
457  
458  
459  
460  
461  
462  
463  
464  
465  
466  
467  
468  
469  
470  
471  
472  
473  
474  
475  
476  
477  
478  
479  
480  
481  
482  
483  
484  
485  
486  
487  
488  
489  
490  
491  
492  
493  
494  
495  
496  
497  
498  
499  
500  
501  
502  
503  
504  
505  
506  
507  
508  
509  
510  
511  
512  
513  
514  
515  
516  
517  
518  
519  
520  
521  
522  
523  
524  
525  
526  
527  
528  
529  
530  
531  
532  
533  
534  
535  
536  
537  
538  
539  
540  
541  
542  
543  
544  
545  
546  
547  
548  
549  
550  
551  
552  
553  
554  
555  
556  
557  
558  
559  
560  
561  
562  
563  
564  
565  
566  
567  
568  
569  
570  
571  
572  
573  
574  
575  
576  
577  
578  
579  
580  
581  
582  
583  
584  
585  
586  
587  
588  
589  
590  
591  
592  
593  
594  
595  
596  
597  
598  
599  
600  
601  
602  
603  
604  
605  
606  
607  
608  
609  
610  
611  
612  
613  
614  
615  
616  
617  
618  
619  
620  
621  
622  
623  
624  
625  
626  
627  
628  
629  
630  
631  
632  
633  
634  
635  
636  
637  
638  
639  
640  
641  
642  
643  
644  
645  
646  
647  
648  
649  
650  
651  
652  
653  
654  
655  
656  
657  
658  
659  
660  
661  
662  
663  
664  
665  
666  
667  
668  
669  
670  
671  
672  
673  
674  
675  
676  
677  
678  
679  
680  
681  
682  
683  
684  
685  
686  
687  
688  
689  
690  
691  
692  
693  
694  
695  
696  
697  
698  
699  
700  
701  
702  
703  
704  
705  
706  
707  
708  
709  
710  
711  
712  
713  
714  
715  
716  
717  
718  
719  
720  
721  
722  
723  
724  
725  
726  
727  
728  
729  
730  
731  
732  
733  
734  
735  
736  
737  
738  
739  
740  
741  
742  
743  
744  
745  
746  
747  
748  
749  
750  
751  
752  
753  
754  
755  
756  
757  
758  
759  
760  
761  
762  
763  
764  
765  
766  
767  
768  
769  
770  
771  
772  
773  
774  
775  
776  
777  
778  
779  
780  
781  
782  
783  
784  
785  
786  
787  
788  
789  
790  
791  
792  
793  
794  
795  
796  
797  
798  
799  
800  
801  
802  
803  
804  
805  
806  
807  
808  
809  
810  
811  
812  
813  
814  
815  
816  
817  
818  
819  
820  
821  
822  
823  
824  
825  
826  
827  
828  
829  
830  
831  
832  
833  
834  
835  
836  
837  
838  
839  
840  
841  
842  
843  
844  
845  
846  
847  
848  
849  
850  
851  
852  
853  
854  
855  
856  
857  
858  
859  
860  
861  
862  
863  
864  
865  
866  
867  
868  
869  
870  
871  
872  
873  
874  
875  
876  
877  
878  
879  
880  
881  
882  
883  
884  
885  
886  
887  
888  
889  
890  
891  
892  
893  
894  
895  
896  
897  
898  
899  
900  
901  
902  
903  
904  
905  
906  
907  
908  
909  
910  
911  
912  
913  
914  
915  
916  
917  
918  
919  
920  
921  
922  
923  
924  
925  
926  
927  
928  
929  
930  
931  
932  
933  
934  
935  
936  
937  
938  
939  
940  
941  
942  
943  
944  
945  
946  
947  
948  
949  
950  
951  
952  
953  
954  
955  
956  
957  
958  
959  
960  
961  
962  
963  
964  
965  
966  
967  
968  
969  
970  
971  
972  
973  
974  
975  
976  
977  
978  
979  
980  
981  
982  
983  
984  
985  
986  
987  
988  
989  
990  
991  
992  
993  
994  
995  
996  
997  
998  
999  
1000

## Results

There were 42 patients included in the study - 20 patients attending the palliative care service, 6 attending the gastroenterology service and 16 attending both (Table 1). The duration of follow up of patients on gabapentin ranged from 3 to 63 months with a mean of 21 months - a total of 75 patient years' follow up.

Prior to commencing gabapentin, investigations were undertaken based on clinical symptoms. 81% had imaging of the gastrointestinal tract., with esophagitis found in 3 patients. These patients remained symptomatic with irritability despite maximum anti-reflux medication. Other sources of irritability were excluded by dental reviews in 38% of children and orthopedic reviews in 62%.

Pain as a possible source of irritability was being treated a regular pain relief in 92.9% of children and 85.7% of children were on acid suppression treatment with either proton-pump inhibitors or H2 receptor antagonists prior to commencement of gabapentin.

Crying and irritability were the most frequently reported symptoms prior to commencement of treatment, occurring in 92.9% and 88% of children, respectively. Grimacing was present in 42.8%, as was vomiting. Dystonic movements were present in 38.1% of patients (Table 2).

The documented reason for commencing gabapentin in 62% of patients was irritability with a further 28.6% commenced for pain of unknown origin. The remainder were isolated cases commenced for feeding difficulties, dystonic movements and autonomic dysfunction.

A good or very good overall response to gabapentin was reported in 59.5% of patients, while minimal or no response occurred in 16.7% and 19%, respectively. Only one patient became more symptomatic with (increased vomiting) while taking gabapentin. Response was not documented in one patient. Improvement in irritability was reported in 71.4% of patients,



1  
2  
3 with 40.4% of patients requiring less pain medications. The duration of follow up of patients  
4  
5 on gabapentin was 21 months (range 3 to 63 months).  
6  
7  
8  
9

10 Adverse effects were rare. There were isolated cases of increased vomiting, alopecia, raised  
11 amino transferase levels and increased 'twitching' which were attributed to gabapentin.  
12  
13 Increased lethargy was reported in three cases (7.1%). There was an apparent loss of response  
14  
15 over time in 4 children (9.5%). The duration of gabapentin treatment in these 4 patients  
16  
17 ranged from 4 to 39 months with a mean of 25 months.  
18  
19  
20

21 Dosing of gabapentin ranged from 5mg/kg once per day up to 30mg/kg three times per day.  
22  
23 Most children were starting on 5mg/kg daily and increased to 20mg/kg three times per day,  
24  
25 as required.  
26  
27  
28  
29  
30

31 Gabapentin was switched to pregabalin as a second line agent in 12 of the 42 children,  
32 including two patients with lethargy, the patient with increased liver enzymes, six who had  
33 ongoing symptoms and three who felt the improvement from gabapentin had worn off.  
34  
35 Treatment was discontinued in three further patients including the patient with alopecia, a  
36  
37 patient who had no benefit and a patient who was no longer symptomatic (Table 3). Follow  
38  
39 up of patients who changed to pregabalin ranged from 4 to 26 months with a mean of 13.5  
40  
41 months, constituting a total of 12 patient years.  
42  
43  
44  
45  
46  
47  
48

49 Pregabalin was felt to have no effect in 2 patients (16.7%), minimal in 6 (50%) and good in 3  
50  
51 (25%). The efficacy was not documented in one patient. No patients reported either a very  
52  
53 good response or a deterioration on pregabalin (Table 4). Only one of the 12 children (8.3%)  
54  
55 suffered increased lethargy on pregabalin. There were no other documented adverse effects.  
56  
57  
58  
59  
60

## Discussion

The findings of this study support the use of gabapentin and pregabalin in the management of pain, distress and irritability in children with SNI. Over 50% of children achieved a substantial improvement of symptoms. Among those in whom there was an inadequate response, lack of medication tolerance or when efficacy was lost, pregabalin had some effect in a substantial majority.

With improvements in the medical management of complex conditions, increasing numbers of children with SNI are surviving through childhood. Pain behaviors are particularly troublesome in this group<sup>15</sup> and associated gastrointestinal manifestations are common. For example, in a study of 32 children with severe neurological impairment, Stallard et al. (2001) found 25 suffered pain every day, with 23 of those having moderate to severe pain<sup>16</sup>. In a study of 101 children Breau et al.<sup>2</sup> reported weekly pain in 35-52% of children with neurological impairment. Parents report higher pain frequency in those patients with a gastrostomy *in situ* or a history of gastrointestinal issues<sup>4</sup>, and the gastrointestinal tract is the second most frequently identified origin of pain in children with severe neurological impairment by parents and carers<sup>1,2</sup>.

In our experience, even in children with a suspected abdominal source for unexplained irritability and distress, a specific gastrointestinal cause for pain is not commonly identified. Visceral hyperalgesia is often invoked as the cause of pain and distress in this group of children<sup>9,10</sup> and the rationale for using gabapentin or pregabalin is strong given its likely role in reducing neuropathic pain<sup>17</sup> as well as its central effects<sup>18</sup>. Most children in this study were formally evaluated clinically by the paediatric gastroenterology service and investigated

1  
2  
3 where appropriate to exclude organic disease. Investigations and/or empiric treatment for  
4 potentially painful gastrointestinal conditions did not resolve the episodes. It is reasonable to  
5 assume that symptoms in such children likely arise from visceral hyperalgesia originating  
6 from either central and/or local gastrointestinal factors.  
7  
8  
9  
10  
11  
12  
13

14 Despite being initially developed as an anti-epileptic medication, and used frequently in the  
15 treatment of neuropathic pain<sup>17</sup>, there is increasing evidence for the use of gabapentin for  
16 symptoms of hyperalgesia<sup>9,18,19</sup>, as we demonstrated in this study. The true mechanism of  
17 action of gabapentin is unknown. However, it is thought to have a predominantly central  
18 effect by binding to voltage gated calcium channels and inhibiting glutamate release.<sup>19</sup>  
19  
20 Pregabalin is structurally related to gabapentin and has a similar inhibitory effect on voltage  
21 gated calcium channels<sup>18</sup>.  
22  
23  
24  
25  
26  
27  
28  
29  
30  
31  
32

33 With 42 patients included, this is the largest study of gabapentinoid use in the management of  
34 pain and irritability in children with SNI and its findings support previous research in the  
35 area. There exist only two previous published studies of gabapentin use in children with SNI  
36 both from Hauer et al.<sup>10,13</sup>. Our finding of improvement in 76% of children is slightly less  
37 than, but not dissimilar to, that reported in these two previous retrospective studies. In  
38 addition, we also noted a low rate of adverse effects, suggesting that this medication is safe  
39 and well tolerated in these children.  
40  
41  
42  
43  
44  
45  
46  
47  
48  
49  
50

51 Loss of response to gabapentin in children with SNI has not previously been reported. We  
52 documented loss of effect in about 10% of children. Although the numbers are small, our data  
53 suggest that pregabalin might offer an effective alternative for these children and those  
54 intolerant of the medication.  
55  
56  
57  
58  
59  
60

1  
2  
3  
4  
5 This study has a number of limitations. It is a retrospective and therefore uncontrolled study  
6  
7  
8 relying on perceptions and interpretations of care givers and health workers, and therefore  
9  
10 open to the biases in both groups. Despite this, documentation of response to gabapentin and  
11  
12 pregabalin was present in all but one of both cohorts. Furthermore, it is accepted that parental  
13  
14 reporting of pain symptoms in children with SNI is accurate<sup>4,5</sup>, with good correlation between  
15  
16 parental child and nursing ratings of pain in such children<sup>6</sup> .  
17  
18  
19  
20  
21  
22

### 23 24 **Conclusion**

25  
26 This is the first study to corroborate the observations of Hauer et al. <sup>10,13</sup> and more than  
27  
28 doubles the numbers of reported children with SNI receiving gabapentin. It suggests a  
29  
30 possible role for pregabalin where gabapentin fails or is not tolerated. Perhaps more  
31  
32 importantly it provides evidence for efficacy of these drugs in a very challenging and  
33  
34 growing cohort of children where there otherwise exist extremely limited therapeutic options.  
35  
36 There is now a compelling need for randomized controlled trial of gabapentinoid drugs in this  
37  
38 group of vulnerable patients.  
39  
40  
41  
42  
43  
44  
45  
46  
47  
48  
49  
50  
51  
52  
53  
54  
55  
56  
57  
58  
59  
60

## References

1. Breau LM, Camfield CS, McGrath PJ, Finley GA. The Incidence of Pain in Children With Severe Cognitive Impairments. 2003;157:1219-1226.
2. Breau LM, Camfield CS, McGrath PJ, Finley GA. Risk factors for pain in children with severe cognitive impairments. *Dev Med Child Neurol*. 2004;46(6):364-371. [http://ovidsp.ovid.com/ovidweb.cgi?T=JS&CSC=Y&NEWS=N&PAGE=fulltext&D=med5&AN=15174527%5Cnhttp://openurl.ac.uk/athens:\\_edu//lfp/LinkFinderPlus/Display?sid=OVID:Ovid+MEDLINE\(R\)&id=pmid:15174527&id=&issn=0012-1622&isbn=&volume=46&issue=6&spage=364&pages=364-](http://ovidsp.ovid.com/ovidweb.cgi?T=JS&CSC=Y&NEWS=N&PAGE=fulltext&D=med5&AN=15174527%5Cnhttp://openurl.ac.uk/athens:_edu//lfp/LinkFinderPlus/Display?sid=OVID:Ovid+MEDLINE(R)&id=pmid:15174527&id=&issn=0012-1622&isbn=&volume=46&issue=6&spage=364&pages=364-)
3. Franck LS, Greenberg CS, Stevens B. PAIN ASSESSMENT IN INFANTS AND CHILDREN. *Pediatr Clin North Am*. 2000;47(3):487-512. doi:10.1016/S0031-3955(05)70222-4.
4. Houlihan CM, O'Donnell M, Conaway M, Stevenson RD. Bodily pain and health-related quality of life in children with cerebral palsy. *Dev Med Child Neurol*. 2004;46(5):305-310. doi:10.1017/S0012162204000507.
5. Burkitt CC, Breau LM, Zabalia M. Parental assessment of pain coping in individuals with intellectual and developmental disabilities. *Res Dev Disabil*. 2011;32(5):1564-1571. doi:10.1016/J.RIDD.2011.01.050.
6. Voepel-Lewis T, Malviya S, Tait A. Validity of Parent Ratings as Proxy Measures of Pain in Children with Cognitive Impairment. *Pain Manag Nurs*. 2005;6(4):168-174. doi:10.1016/J.PMN.2005.08.004.
7. Siden H, Carleton BC, Oberlander T. Physician variability in treating pain/irritability of unknown origin in children with severe neurological impairment. *Pain Res Manag*. 2013;18(5):243-249. <http://www.ncbi.nlm.nih.gov/pubmed/23885348>.
8. Mayer EA, Gebhart GF. Basic and clinical aspects of visceral hyperalgesia. *Gastroenterology*. 1994;107(1):271-293. doi:10.1016/0016-5085(94)90086-8.
9. Hauer J. Feeding Intolerance in Children with Severe Impairment of the Central Nervous System: Strategies for Treatment and Prevention. *Children*. 2017;5(1):1. doi:10.3390/children5010001.
10. Hauer JM, Wical BS, Charnas L. Gabapentin Successfully Manages Chronic Unexplained Irritability in Children With Severe Neurologic Impairment. *Pediatrics*. 2007;119(2):e519-e522. doi:10.1542/peds.2006-1609.
11. Zangen T, Ciarla C, Zangen S, et al. Gastrointestinal motility and sensory abnormalities may contribute to food refusal in medically fragile toddlers. *J Pediatr Gastroenterol Nutr*. 2003;37(3):287-293. doi:10.1097/00005176-200309000-00016.
12. Collins S. Putative therapeutic targets in the treatment of visceral hyperalgesia. *Gut*. 2004;53(90002):19ii-21. doi:10.1136/gut.2003.033456.

- 1  
2  
3  
4  
5  
6  
7  
8  
9  
10  
11  
12  
13  
14  
15  
16  
17  
18  
19  
20  
21  
22  
23  
24  
25  
26  
27  
28  
29  
30
13. Hauer J, Solodiuk J. Gabapentin for management of recurrent pain in 22 nonverbal children with severe neurological impairment: a retrospective analysis. *J Palliat Med.* 2015;18(5):453-456.
  14. Park-Davis. Label: gabapentin (NEURONTIN). 2017;(October).  
[https://www.accessdata.fda.gov/drugsatfda\\_docs/label/2017/020235s064\\_020882s047\\_021129s046lbl.pdf](https://www.accessdata.fda.gov/drugsatfda_docs/label/2017/020235s064_020882s047_021129s046lbl.pdf).
  15. Massaro M, Pastore S, Ventura A, Barbi E. Pain in cognitively impaired children: A focus for general pediatricians. *Eur J Pediatr.* 2013;172(1):9-14. doi:10.1007/s00431-012-1720-x.
  16. Stallard P, Williams L, Lenton S, Velleman R. Pain in cognitively impaired, non-communicating children. *Arch Dis Child.* 2001;85(6):460-462. doi:10.1136/adc.85.6.460.
  17. Serpell MG. Gabapentin in neuropathic pain syndromes: a randomised, double-blind, placebo-controlled trial. *Pain.* 2002;99(3):557-566. doi:10.1016/S0304-3959(02)00255-5.
  18. Sills GJ. The mechanisms of action of gabapentin and pregabalin. *Curr Opin Pharmacol.* 2006;6(1):108-113. doi:10.1016/J.COPH.2005.11.003.
  19. Gottrup H, Juhl G, Kristensen AD, et al. Chronic oral gabapentin reduces elements of central sensitization in human experimental hyperalgesia. *Anesthesiology.* 2004;101(6):1400-1408. doi:10.1097/00000542-200412000-00021.

31  
32  
33  
34  
35  
36  
37  
38  
39  
40  
41  
42  
43  
44  
45  
46  
47  
48  
49  
50  
51  
52  
53  
54  
55  
56  
57  
58  
59  
60

### Tables:

Table 1. Demographics

|                                   | n  | %    |
|-----------------------------------|----|------|
| Gender                            |    |      |
| Male                              | 23 | 54.8 |
| Female                            | 19 | 45.2 |
| Age at referral                   |    |      |
| 0-5 years                         | 26 | 61.9 |
| 6- 12 years                       | 13 | 31   |
| 13- 18 years                      | 3  | 7.1  |
| Diagnosis                         |    |      |
| Epileptic encephalopathies        | 7  | 16.7 |
| Genetic                           | 9  | 21.4 |
| Cerebral palsy                    | 16 | 28   |
| Developmental delay - undiagnosed | 10 | 23.8 |
| Non verbal                        | 41 | 97.6 |
| Attending                         |    |      |
| Gastroenterology                  | 6  | 14.3 |
| Palliative Care                   | 20 | 47.6 |
| Both                              | 16 | 38.1 |

Table 2. Reported Symptoms

|                            | <b>n</b> | <b>%</b> |
|----------------------------|----------|----------|
| Crying                     | 39       | 92.9     |
| Irritability               | 37       | 88       |
| Dystonic movements         | 16       | 38.1     |
| Grimacing                  | 18       | 42.8     |
| Regurgitation and vomiting | 18       | 42.8     |

Table 3. Effectiveness of gabapentin

|                                        | <b>n</b> | <b>%</b> |
|----------------------------------------|----------|----------|
| <b>Overall response to gabapentin</b>  |          |          |
| Deteriorated                           | 1        | 2.4      |
| None                                   | 8        | 19       |
| Minimal                                | 7        | 16.7     |
| Good                                   | 10       | 23.8     |
| Very Good                              | 15       | 35.7     |
| Not Documented                         | 1        | 2.4      |
| <b>Change in irritability</b>          |          |          |
| Yes                                    | 30       | 71.4     |
| No                                     | 11       | 26.2     |
| Not documented                         | 1        | 2.4      |
| <b>Pain reduction</b>                  |          |          |
| Yes                                    | 17       | 40.4     |
| No                                     | 23       | 54.8     |
| Not documented                         | 2        | 4.8      |
| <b>Adverse effects</b>                 |          |          |
| None                                   | 31       | 73.9     |
| Improvement reducing over time         | 4        | 9.5      |
| Lethargy                               | 3        | 7.1      |
| Twitching                              | 1        | 2.4      |
| Alopecia                               | 1        | 2.4      |
| Vomiting                               | 1        | 2.4      |
| Elevated liver enzymes                 | 1        | 2.4      |
| <b>Reason for change to pregabalin</b> |          |          |
| Lethargy                               | 2        | 16.6     |
| Ongoing symptoms                       | 6        | 50       |
| Elevated liver enzymes                 | 1        | 8.3      |
| Improvement reducing over time         | 3        | 25       |
| Gabapentin discontinued                | 15       | 35.7     |
| Of them                                |          |          |

|                       |    |     |
|-----------------------|----|-----|
| Alopecia              | 1  | 6.7 |
| Asymptomatic          | 1  | 6.7 |
| No improvement        | 1  | 6.7 |
| Changed to pregabalin | 12 | 80  |

Table 4. Pregabalin

|                                    | <b>n</b> | <b>%</b> |
|------------------------------------|----------|----------|
| Total switched to pregabalin       | 12       |          |
| Rationale for change to pregabalin |          |          |
| Lethargy                           | 2        | 16.6     |
| Ongoing symptoms                   | 6        | 50       |
| Elevated liver enzymes             | 1        | 8.3      |
| Improvement reducing over time     | 3        | 25       |
| Efficacy of pregabalin             |          |          |
| Deteriorated                       | 0        | 0        |
| None                               | 2        | 16.7     |
| Minimal                            | 6        | 50       |
| Good                               | 3        | 25       |
| Very Good                          | 0        | 0        |
| Not Documented                     | 1        | 8.4      |



1  
2  
3  
4  
5  
6  
7  
8  
9  
10  
11  
12  
13  
14  
15  
16  
17  
18  
19  
20  
21  
22  
23  
24  
25  
26  
27  
28  
29  
30  
31  
32  
33  
34  
35  
36  
37  
38  
39  
40  
41  
42  
43  
44  
45  
46  
47  
48  
49  
50  
51  
52  
53  
54  
55  
56  
57  
58  
59  
60

Confidential: For Review Only

# BMJ Paediatrics Open

## Gabapentin for the Treatment of Pain Manifestations in Children with Severe Neurological Impairment- a Single Centre Retrospective Review

|                               |                                                                                                                                                                                                                                                                                                                                                                                                                                                                                                                                                                                                                                                                                                                                                                                                                                                                                                                                                                                                     |
|-------------------------------|-----------------------------------------------------------------------------------------------------------------------------------------------------------------------------------------------------------------------------------------------------------------------------------------------------------------------------------------------------------------------------------------------------------------------------------------------------------------------------------------------------------------------------------------------------------------------------------------------------------------------------------------------------------------------------------------------------------------------------------------------------------------------------------------------------------------------------------------------------------------------------------------------------------------------------------------------------------------------------------------------------|
| Journal:                      | <i>BMJ Paediatrics Open</i>                                                                                                                                                                                                                                                                                                                                                                                                                                                                                                                                                                                                                                                                                                                                                                                                                                                                                                                                                                         |
| Manuscript ID                 | bmjpo-2019-000467.R1                                                                                                                                                                                                                                                                                                                                                                                                                                                                                                                                                                                                                                                                                                                                                                                                                                                                                                                                                                                |
| Article Type:                 | Original research letter                                                                                                                                                                                                                                                                                                                                                                                                                                                                                                                                                                                                                                                                                                                                                                                                                                                                                                                                                                            |
| Date Submitted by the Author: | 13-Mar-2019                                                                                                                                                                                                                                                                                                                                                                                                                                                                                                                                                                                                                                                                                                                                                                                                                                                                                                                                                                                         |
| Complete List of Authors:     | Collins, Aedin; Our Lady's Children's Hospital, National Centre for Paediatric Gastroenterology, Hepatology and Nutrition<br>Mannion, Rory; Our Lady's Children's Hospital, National Centre for Paediatric Gastroenterology, Hepatology and Nutrition<br>Broderick, Annemarie; Our Lady's Children's Hospital, Crumlin, National Centre for Paediatric Gastroenterology, Hepatology and Nutrition; UCD School of Medicine and Medical Science,<br>Hussey, Séamus; Our Lady's Children's Hospital, Crumlin and the National Children's Research Centre, National Centre for Paediatric Gastroenterology, Hepatology and Nutrition; UCD School of Medicine and Medical Science,<br>Devins, Mary; Our Lady's Children's Hospital, Palliative Medicine; Coombe Women and Infants University Hospital<br>Bourke, Billy; Our Lady's Children's Hospital, Crumlin, National Centre for Paediatric Gastroenterology, Hepatology and Nutrition; UCD School of Medicine and Medical Science, Conway Institute |
| Keywords:                     | General Paediatrics, Neurodisability, Pain, Palliative Care, Gastroenterology                                                                                                                                                                                                                                                                                                                                                                                                                                                                                                                                                                                                                                                                                                                                                                                                                                                                                                                       |
|                               |                                                                                                                                                                                                                                                                                                                                                                                                                                                                                                                                                                                                                                                                                                                                                                                                                                                                                                                                                                                                     |

SCHOLARONE™  
Manuscripts

1  
2  
3  
4  
5  
6  
7  
8  
9

## Gabapentin for the Treatment of Pain Manifestations in Children with Severe Neurological Impairment- a Single Centre Retrospective Review

Aedín Collins<sup>1</sup>, Rory Mannion<sup>1</sup>, Annemarie Broderick<sup>1</sup>, Séamus Hussey<sup>1,3</sup>, Mary Devins<sup>2</sup>,  
Billy Bourke<sup>1,3</sup>

- 10  
11  
12  
13  
14  
15  
16  
17
1. National Centre for Paediatric Gastroenterology, Hepatology and Nutrition, Our Lady's Children's Hospital, Crumlin, Dublin 12, Ireland
  2. Department of Palliative Care, Our Lady's Children's Hospital, Crumlin 12, Dublin, Ireland
  3. National Children's Research Center and Department of Paediatrics, University College Dublin, Ireland

### Corresponding Author:

Aedín Collins

Senior Paediatric Fellow, Department of General Paediatrics, Evelina London Children's Hospital, Westminster Bridge Rd, Lambeth. London SE1 7EH

00447538 584 683

[aedincollins@gmail.com](mailto:aedincollins@gmail.com)

### Abstract

28  
29  
30  
31  
32  
33  
34  
35  
36  
37  
38  
39

Pain, irritability and feeding intolerance are common symptoms affecting quality of life in children with severe neurological impairment (SNI). We performed a retrospective study to explore the use of gabapentinoid medications for symptom control in children with SNI. Patients attending the palliative care or gastroenterology department being treated with gabapentin for irritability, vomiting or pain of unknown origin were included. Information was gathered retrospectively from medical documentation. Irritability was reduced in 30 of the 42 patients included. Pregabalin was used successfully as a second line agent in 9 children. These results support the use of gabapentinoids in this patient cohort.

40  
41  
42  
43  
44  
45  
46  
47  
48  
49  
50  
51  
52  
53  
54  
55  
56  
57  
58  
59  
60

Word Count 100/100

## Main text

Pain and distress symptoms are amongst the most challenging clinical problems faced by those caring for children with severe neurological impairment (SNI). Up to 50% of children with cognitive impairment are reported to have pain episodes every week<sup>1</sup>. Even in the context of an apparent gastrointestinal source, the underlying cause for pain and irritability often remains unclear<sup>2</sup>. Visceral hyperalgesia, an increased response and sensitivity to stimuli within the gastrointestinal tract<sup>3</sup>, is a potential cause of this pain and irritability<sup>4</sup>.

In a study published over a decade ago, Hauer et al. first identified the potential benefits of gabapentin in 9 children with SNI<sup>4</sup> and a follow up study by the same author identified an improvement in pain behaviours in over 90% of 22 children treated with gabapentin<sup>5</sup>. We performed a retrospective study in 42 patients, the largest cohort studied to date, to see if the findings of Hauer's seminal studies<sup>4,5</sup> could be replicated, and to investigate if pregabalin is an appropriate second line agent for this indication.

A retrospective chart review of paediatric patients with SNI attending the gastroenterology and palliative care services at Our Lady's Children's Hospital Crumlin was performed. All patients who had been prescribed gabapentin treatment for pain or irritability of unknown origin were included. Information was gathered from medical notes. Prior to commencing gabapentin all children in this study were formally evaluated clinically by the paediatric gastroenterology or palliative care services, and investigated or treated empirically for organic disease, without improvement of their symptoms. The rationale for using gabapentin or pregabalin in these children with possible visceral hyperalgesia was based on its role in reducing neuropathic pain as well as its central effects<sup>6</sup>. Patients were not involved in the design or the conduction of this research. Ethical approval was received by the research ethics committee of the hospital.

There were 42 patients included in the study, with a duration of follow up ranging from 3 to 63 months and a mean duration of 21 months - a total of 75 patient years' follow up. The most frequently reported symptoms prior to commencement of gabapentin were crying and irritability, occurring in 39 and 37 children, respectively. A good or very good overall response to gabapentin was reported in 25 patients, while minimal or no response occurred in 8 and 7 patients, respectively. Improvement in irritability was reported in 30 patients and 17 patients required less pain medication (Table 1) Adverse effects were rare. Increased lethargy was reported in three cases and there were isolated cases of vomiting, alopecia, twitching and raised liver enzyme levels. There was an apparent loss of response over time in 4 children (Table 1).

Gabapentin was switched to pregabalin as a second line agent in 12 of the 42 children. There was no noted effect of pregabalin in 2 patients, minimal in 6, good in 3 and not documented in one (Table 2).

This is the first study to corroborate the observations of Hauer et al.<sup>4,5</sup> and more than doubles the numbers of reported children with SNI receiving gabapentin. It suggests a possible role for pregabalin where gabapentin fails or is not tolerated. Perhaps more importantly, it provides evidence for the efficacy of these medications in a very challenging and growing cohort of children where there otherwise exists extremely limited therapeutic options.

Word count: 553/600

## References:

1. Breau LM, Camfield CS, Mcgrath PJ, Finley GA. The Incidence of Pain in Children With Severe Cognitive Impairments. 2003;157:1219-1226. doi:10.1001/archpedi.157.12.1219
2. Siden H, Carleton BC, Oberlander T. Physician variability in treating pain/irritability of unknown origin in children with severe neurological impairment. *Pain Res Manag.* 2013;18(5):243-249. doi:10.1155/2013/193937.
3. Mayer EA, Gebhart GF. Basic and clinical aspects of visceral hyperalgesia. *Gastroenterology.* 1994;107(1):271-293. doi:10.1016/0016-5085(94)90086-8.
4. Hauer JM, Wical BS, Charnas L. Gabapentin Successfully Manages Chronic Unexplained Irritability in Children With Severe Neurologic Impairment. *Pediatrics.* 2007;119(2):e519-e522. doi:10.1542/peds.2006-1609.
5. Hauer J, Solodiuk J. Gabapentin for management of recurrent pain in 22 nonverbal children with severe neurological impairment: a retrospective analysis. *J Palliat Med.* 2015;18(5):453-456. <https://doi.org/10.1089/jpm.2014.0359>.
6. Serpell MG. Gabapentin in neuropathic pain syndromes: a randomised, double-blind, placebo-controlled trial. *Pain.* 2002;99(3):557-566. doi:10.1016/S0304-3959(02)00255-5.

Table 1. Effectiveness of gabapentin

|                                | n  | %  |
|--------------------------------|----|----|
| Overall response to gabapentin |    |    |
| Deteriorated                   | 1  | 2  |
| None                           | 8  | 19 |
| Minimal                        | 7  | 17 |
| Good                           | 10 | 24 |
| Very Good                      | 15 | 36 |
| Not Documented                 | 1  | 2  |
| Change in irritability         |    |    |
| Yes                            | 30 | 71 |
| No                             | 11 | 26 |
| Not documented                 | 1  | 2  |
| Pain reduction                 |    |    |
| Yes                            | 17 | 40 |
| No                             | 23 | 55 |
| Not documented                 | 2  | 5  |
| Adverse effects                |    |    |
| None                           | 31 | 74 |
| Improvement reducing over time | 4  | 10 |
| Lethargy                       | 3  | 7  |
| Twitching                      | 1  | 2  |

|                                 |    |    |
|---------------------------------|----|----|
| Alopecia                        | 1  | 2  |
| Vomiting                        | 1  | 2  |
| Elevated liver enzymes          | 1  | 2  |
| Reason for change to pregabalin |    |    |
| Lethargy                        | 2  | 17 |
| Ongoing symptoms                | 6  | 50 |
| Elevated liver enzymes          | 1  | 8  |
| Improvement reducing over time  | 3  | 25 |
| Gabapentin discontinued         | 15 | 36 |
| Of them                         |    |    |
| Alopecia                        | 1  | 7  |
| Asymptomatic                    | 1  | 7  |
| No improvement                  | 1  | 7  |
| Changed to pregabalin           | 12 | 80 |

Table 2. Pregabalin

|                                    | n  | %  |
|------------------------------------|----|----|
| Total switched to pregabalin       | 12 |    |
| Rationale for change to pregabalin |    |    |
| Lethargy                           | 2  | 17 |
| Ongoing symptoms                   | 6  | 50 |
| Elevated liver enzymes             | 1  | 8  |
| Improvement reducing over time     | 3  | 25 |
| Efficacy of pregabalin             |    |    |
| Deteriorated                       | 0  | 0  |
| None                               | 2  | 17 |
| Minimal                            | 6  | 50 |
| Good                               | 3  | 25 |
| Very Good                          | 0  | 0  |
| Not Documented                     | 1  | 8  |

# BMJ Paediatrics Open

## Gabapentin for the Treatment of Pain Manifestations in Children with Severe Neurological Impairment- a Single Centre Retrospective Review

|                               |                                                                                                                                                                                                                                                                                                                                                                                                                                                                                                                                                                                                                                                                                                                                                                                                                                                                                                                                                                                                     |
|-------------------------------|-----------------------------------------------------------------------------------------------------------------------------------------------------------------------------------------------------------------------------------------------------------------------------------------------------------------------------------------------------------------------------------------------------------------------------------------------------------------------------------------------------------------------------------------------------------------------------------------------------------------------------------------------------------------------------------------------------------------------------------------------------------------------------------------------------------------------------------------------------------------------------------------------------------------------------------------------------------------------------------------------------|
| Journal:                      | <i>BMJ Paediatrics Open</i>                                                                                                                                                                                                                                                                                                                                                                                                                                                                                                                                                                                                                                                                                                                                                                                                                                                                                                                                                                         |
| Manuscript ID                 | bmjpo-2019-000467.R2                                                                                                                                                                                                                                                                                                                                                                                                                                                                                                                                                                                                                                                                                                                                                                                                                                                                                                                                                                                |
| Article Type:                 | Original research letter                                                                                                                                                                                                                                                                                                                                                                                                                                                                                                                                                                                                                                                                                                                                                                                                                                                                                                                                                                            |
| Date Submitted by the Author: | 26-May-2019                                                                                                                                                                                                                                                                                                                                                                                                                                                                                                                                                                                                                                                                                                                                                                                                                                                                                                                                                                                         |
| Complete List of Authors:     | Collins, Aedin; Our Lady's Children's Hospital, National Centre for Paediatric Gastroenterology, Hepatology and Nutrition<br>Mannion, Rory; Our Lady's Children's Hospital, National Centre for Paediatric Gastroenterology, Hepatology and Nutrition<br>Broderick, Annemarie; Our Lady's Children's Hospital, Crumlin, National Centre for Paediatric Gastroenterology, Hepatology and Nutrition; UCD School of Medicine and Medical Science,<br>Hussey, Séamus; Our Lady's Children's Hospital, Crumlin and the National Children's Research Centre, National Centre for Paediatric Gastroenterology, Hepatology and Nutrition; UCD School of Medicine and Medical Science,<br>Devins, Mary; Our Lady's Children's Hospital, Palliative Medicine; Coombe Women and Infants University Hospital<br>Bourke, Billy; Our Lady's Children's Hospital, Crumlin, National Centre for Paediatric Gastroenterology, Hepatology and Nutrition; UCD School of Medicine and Medical Science, Conway Institute |
| Keywords:                     | General Paediatrics, Neurodisability, Pain, Palliative Care, Gastroenterology                                                                                                                                                                                                                                                                                                                                                                                                                                                                                                                                                                                                                                                                                                                                                                                                                                                                                                                       |
|                               |                                                                                                                                                                                                                                                                                                                                                                                                                                                                                                                                                                                                                                                                                                                                                                                                                                                                                                                                                                                                     |

SCHOLARONE™  
Manuscripts

1  
2  
3  
4  
5  
6  
7  
8  
9

## Gabapentin for the Treatment of Pain Manifestations in Children with Severe Neurological Impairment- a Single Centre Retrospective Review

Aedín Collins<sup>1</sup>, Rory Mannion<sup>1</sup>, Annemarie Broderick<sup>1</sup>, Séamus Hussey<sup>1,3</sup>, Mary Devins<sup>2</sup>,  
Billy Bourke<sup>1,3</sup>

- 10  
11  
12  
13  
14  
15  
16  
17
1. National Centre for Paediatric Gastroenterology, Hepatology and Nutrition, Our Lady's Children's Hospital, Crumlin, Dublin 12, Ireland
  2. Department of Palliative Care, Our Lady's Children's Hospital, Crumlin 12, Dublin, Ireland
  3. National Children's Research Center and Department of Paediatrics, University College Dublin, Ireland

### Corresponding Author:

Aedín Collins

Senior Paediatric Fellow, Department of General Paediatrics, Evelina London Children's Hospital, Westminster Bridge Rd, Lambeth. London SE1 7EH

00447538 584 683

[aedincollins@gmail.com](mailto:aedincollins@gmail.com)

18  
19  
20  
21  
22  
23  
24  
25  
26  
27  
28  
29

**Funding Statement:** This research received no specific grant from any funding agency in the public, commercial or not-for-profit sectors.

30  
31  
32

**Competing Interests Statement:** The authors have no conflicts of interest relevant to this article to disclose.

### Contributorship Statement:

33  
34  
35  
36  
37  
38

Dr Collins conceptualised and designed the study, designed data collection instruments, collected the data, drafted the initial manuscript, and reviewed and revised the manuscript.

Dr Mannion designed the study, designed data collection instruments, collected the data and reviewed and revised the manuscript.

Dr Hussey and Dr Broderick conceptualised the study, designed data collection instruments and critically reviewed the manuscript for important intellectual content.

Prof Bourke and Dr Devins conceptualised and designed the study, designed data collection instruments, carried out the initial analysis and reviewed and revised the manuscript.

All authors agree to be accountable for all aspects of the work.

39  
40  
41  
42  
43  
44  
45  
46  
47  
48  
49  
50  
51  
52  
53  
54  
55  
56  
57  
58  
59  
60



**Abstract**

Pain, irritability and feeding intolerance are common symptoms affecting quality of life in children with severe neurological impairment (SNI). We performed a retrospective study to explore the use of gabapentinoid medications for symptom control in children with SNI. Patients attending the palliative care or gastroenterology department being treated with gabapentin for irritability, vomiting or pain of unknown origin were included. Information was gathered retrospectively from medical documentation. Irritability was reduced in 30 of the 42 patients included. Gabapentin was discontinued in 15 children, 12 of whom then received pregabalin. Three children had a good response to pregabalin, six a minimal improvement and three no improvement. These results support the use of gabapentinoids in this patient cohort.

## Main text

Pain and distress symptoms are amongst the most challenging clinical problems faced by those caring for children with severe neurological impairment (SNI). Up to 50% of children with severe cognitive impairment are reported to have pain episodes every week<sup>1</sup>. Even in the context of an apparent gastrointestinal source, the underlying cause for pain and irritability often remains unclear<sup>2</sup>. Both central neuropathic pain and visceral hyperalgesia, an increased response and sensitivity to stimuli within the gastrointestinal tract<sup>3</sup>, are potential causes of this pain and irritability<sup>4,5</sup>.

In a study published over a decade ago, Hauer et al. first identified the potential benefits of gabapentin in 9 children with SNI<sup>4</sup> and a follow up study by the same author identified an improvement in pain behaviours in over 90% of 22 children treated with gabapentin<sup>5</sup>. We performed a retrospective study in 42 patients, to see if the findings of Hauer's seminal studies<sup>4,5</sup> could be replicated, and to investigate if pregabalin is an appropriate second line agent for this indication.

A retrospective chart review of paediatric patients with SNI attending the gastroenterology and palliative care services at Our Lady's Children's Hospital Crumlin was performed. All patients who had been prescribed gabapentin treatment for pain or irritability of unknown origin were included. Information was gathered from medical notes. Prior to commencing gabapentin all children in this study were formally evaluated clinically by the paediatric gastroenterology or palliative care services, and investigated or treated empirically for organic disease, without improvement of their symptoms. The rationale for using gabapentin or pregabalin in these children with possible visceral hyperalgesia was based on its role in reducing neuropathic pain as well as its central effects<sup>6</sup>.

Patients were not involved in the design or the conduction of this research. Ethical approval was received by the research ethics committee of the hospital.

There were 42 patients included in the study, with follow up ranging from 3 to 63 months and a mean duration of 21 months - a total of 75 patient years' follow up. The most frequently reported symptoms prior to commencement of gabapentin were crying and irritability, occurring in 39 and 37 children, respectively. A good or very good overall response to gabapentin was reported in 25 patients, while minimal or no response occurred in 8 and 7 patients, respectively. Improvement in irritability was reported in 30 patients and 17 patients required less pain medication (Table 1) Increased lethargy was reported in three cases and there were isolated cases of vomiting, alopecia, twitching and raised liver enzyme levels. There was an apparent loss of response over time in 4 children (Table 1). The mean duration of gabapentin treatment in those 4 children was 25 months. All were on the highest dose of 60mg/kg/day.

Gabapentin was switched to pregabalin as a second line agent in 12 of the 42 children. The dose of gabapentin was maximised prior to switching in 11 of the children. There was no noted effect of pregabalin in 2 patients, minimal in 6, good in 3 and not documented in one (Table 2). The mean duration of follow up of patients on pregabalin was 13.5 months.

Acknowledging the limitations surrounding the retrospective nature of this study, it nevertheless serves to corroborate the observations of Hauer et al.<sup>4,5</sup> and more than doubles the numbers of reported children with SNI receiving gabapentin. It suggests a possible role for pregabalin where gabapentin fails or is not tolerated. Perhaps more importantly, it

provides evidence for the efficacy of these medications in a very challenging and growing cohort of children where there otherwise exists extremely limited therapeutic options.

Word count: 599/600

#### References:

1. Breau LM, Camfield CS, Mcgrath PJ, Finley GA. The Incidence of Pain in Children With Severe Cognitive Impairments. 2003;157:1219-1226.
2. Siden H, Carleton BC, Oberlander T. Physician variability in treating pain/irritability of unknown origin in children with severe neurological impairment. *Pain Res Manag.* 2013;18(5):243-249. doi:10.1155/2013/193937.
3. Mayer EA, Gebhart GF. Basic and clinical aspects of visceral hyperalgesia. *Gastroenterology.* 1994;107(1):271-293. doi:10.1016/0016-5085(94)90086-8.
4. Hauer JM, Wical BS, Charnas L. Gabapentin Successfully Manages Chronic Unexplained Irritability in Children With Severe Neurologic Impairment. *Pediatrics.* 2007;119(2):e519-e522. doi:10.1542/peds.2006-1609.
5. Hauer J, Solodiuk J. Gabapentin for management of recurrent pain in 22 nonverbal children with severe neurological impairment: a retrospective analysis. *J Palliat Med.* 2015;18(5):453-456. <https://doi.org/10.1089/jpm.2014.0359>.
6. Serpell MG. Gabapentin in neuropathic pain syndromes: a randomised, double-blind, placebo-controlled trial. *Pain.* 2002;99(3):557-566. doi:10.1016/S0304-3959(02)00255-5.

Table 1. Effectiveness of gabapentin

|                                | n  | %  |
|--------------------------------|----|----|
| Overall response to gabapentin |    |    |
| Deteriorated                   | 1  | 2  |
| None                           | 8  | 19 |
| Minimal                        | 7  | 17 |
| Good                           | 10 | 24 |
| Very Good                      | 15 | 36 |
| Not Documented                 | 1  | 2  |
| Change in irritability         |    |    |
| Yes                            | 30 | 71 |
| No                             | 11 | 26 |
| Not documented                 | 1  | 2  |
| Pain reduction                 |    |    |
| Yes                            | 17 | 40 |
| No                             | 23 | 55 |
| Not documented                 | 2  | 5  |
| Adverse effects                |    |    |
| None                           | 31 | 74 |
| Improvement reducing over time | 4  | 10 |

|                         |    |    |
|-------------------------|----|----|
| Lethargy                | 3  | 7  |
| Twitching               | 1  | 2  |
| Alopecia                | 1  | 2  |
| Vomiting                | 1  | 2  |
| Elevated liver enzymes  | 1  | 2  |
| Gabapentin discontinued | 15 | 36 |
| Of them                 |    |    |
| Alopecia                | 1  | 7  |
| Asymptomatic            | 1  | 7  |
| No improvement          | 1  | 7  |
| Changed to pregabalin   | 12 | 80 |

Table 2. Pregabalin

|                                    | n  | %  |
|------------------------------------|----|----|
| Total switched to pregabalin       | 12 |    |
| Rationale for change to pregabalin |    |    |
| Lethargy                           | 2  | 17 |
| Ongoing symptoms                   | 6  | 50 |
| Elevated liver enzymes             | 1  | 8  |
| Improvement reducing over time     | 3  | 25 |
| Efficacy of pregabalin             |    |    |
| Deteriorated                       | 0  | 0  |
| None                               | 2  | 17 |
| Minimal                            | 6  | 50 |
| Good                               | 3  | 25 |
| Very Good                          | 0  | 0  |
| Not Documented                     | 1  | 8  |
